# Supplementary material for: Evaluation of the Benefits, Satisfaction, and Limitations of Intergenerational Face-to-Face Activities: A General Population Survey in Spain
Source: MDPI journal article supplement (doi:10.3390/ijerph18189683), 2021-09-14

**PRESENTACIÓN Y CONFIDENCIALIDAD****PRESENTACIÓN**

Se trata de una investigación cuyo objetivo es estudiar las **ACTIVIDADES CONJUNTAS REALIZADAS POR MIEMBROS DE DISTINTAS GENERACIONES**, para el diseño de pautas precisas de intervención que mejoren su bienestar y calidad de vida.

Para ello solicitamos su valiosa colaboración en la siguiente encuesta.

No existen respuestas correctas o incorrectas, sólo situaciones habituales diferentes. La mejor respuesta es la que refleje honestamente su realidad y punto de vista.

**COMPROMISO DE CONFIDENCIALIDAD Y ANONIMATO**

Sus respuestas son totalmente confidenciales y sólo tratadas a efectos estadísticos globales, de acuerdo con las normas éticas y deontológicas aplicables a toda investigación científica.

Esta encuesta es anónima, por lo que en ningún caso será posible su identificación a través de los datos que proporcione.

**AGRADECIMIENTO**

Le agradecemos su generosa y necesaria colaboración sin la cual no sería posible realizar esta investigación.

**RECONOCIMIENTO**

Se trata de una investigación pre-doctoral financiada por la JCyL (EDU/1083/2013) y la Unión Europea (FEDER 2014-2020) a A. Canedo, dentro del Grupo de Investigación de Excelencia (JCyL, GREX259, Dir JN García) cuyo objetivo es estudiar las **ACTIVIDADES CONJUNTAS REALIZADAS POR MIEMBROS DE DISTINTAS GENERACIONES**, para el diseño de pautas precisas de intervención que mejoren el bienestar de los participantes.

## CONSENTIMIENTO INFORMADO

Si acepta colaborar en esta investigación, marque la opción "Acepto colaborar voluntariamente en el estudio" y complete la encuesta confidencial y anónima.

Para avanzar pulse **SIGUIENTE**.

En todo momento puede retroceder en la encuesta y modificar sus respuestas. Para ello, debe pulsar **ANTERIOR**.

Cuando haya concluido sus respuestas, pulse **FINALIZAR Y ENVIAR**.

### 1. ACEPTACIÓN DE COLABORACIÓN

- ☐ Acepto colaborar voluntariamente en el estudio
- ☐ No acepto colaborar en el estudio

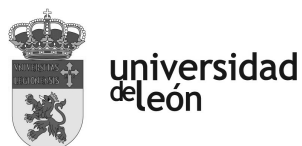

## Acción Conjunta Intergeneracional (ACIG)

### DATOS DEMOGRÁFICOS (DDM)

#### 2. Indique la fecha de nacimiento de su

MADRE

| DD                   | MM                   | AAAA                 |
|----------------------|----------------------|----------------------|
| <input type="text"/> | <input type="text"/> | <input type="text"/> |

#### 3. Indique la fecha de nacimiento de su

PADRE

| DD                   | MM                   | AAAA                 |
|----------------------|----------------------|----------------------|
| <input type="text"/> | <input type="text"/> | <input type="text"/> |

#### 4. Género

- ☐ Hombre
- ☐ Mujer

#### 5. Fecha de nacimiento

Día / Mes / Año

| DD                   | MM                   | AAAA                 |
|----------------------|----------------------|----------------------|
| <input type="text"/> | <input type="text"/> | <input type="text"/> |

## 6. Edad

## 7. Nacionalidad

- ☐ Española
- ☐ Extranjera
- ☐ Española y otra

## 8. Lugar de procedencia

- ☐ Zona rural pueblo pequeño
- ☐ Zona rural pueblo grande
- ☐ Zona urbana ciudad pequeña
- ☐ Zona urbana ciudad grande

## 9. Núcleo poblacional de residencia

- ☐ Localidad de menos de 250 habitantes
- ☐ Localidad de 250-2000 habitantes
- ☐ Localidad de 2001-50.000 habitantes
- ☐ Localidad de 50.001-300.000 habitantes
- ☐ Localidad de más de 300.000 habitantes

## 10. Estado Civil

- ☐ No procede
- ☐ Soltero/a
- ☐ Casado/a o en pareja
- ☐ Viudo/a
- ☐ Separado/a
- ☐ Divorciado/a

## 11. ¿Dónde vive actualmente?

- ☐ En mi casa
- ☐ En casa de un familiar
- ☐ En casa de un amigo/a
- ☐ En un centro o residencia

12. ¿Con quién vive actualmente?

- ☐ Solo
- ☐ En pareja
- ☐ En pareja con hijos
- ☐ En pareja con nietos
- ☐ En pareja con hijos y nietos
- ☐ Con mis hijos
- ☐ Con mis nietos
- ☐ Con hijos y nietos
- ☐ Con mis padres
- ☐ Con mis abuelos
- ☐ Con mis padres y abuelos
- ☐ Con otros familiares
- ☐ Con amigos
- ☐ Otro (especifique)

13. ¿Qué nivel de estudios ha alcanzado?

- ☐ Estudios Primarios
- ☐ Estudios Secundarios
- ☐ Estudios Profesionales
- ☐ Estudios Universitarios

14. Autonomía Personal

|                                                         | Solo/a                | Con ayuda de un familiar/es | Con ayuda de un profesional/es | Con ayuda de otra persona/as |
|---------------------------------------------------------|-----------------------|-----------------------------|--------------------------------|------------------------------|
| Habitualmente realizo las actividades de la vida diaria | <input type="radio"/> | <input type="radio"/>       | <input type="radio"/>          | <input type="radio"/>        |

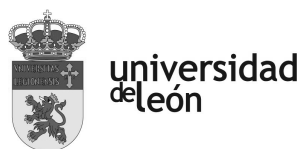

Acción Conjunta Intergeneracional (ACIG)

**Actividad Laboral (DDM)**

15. En relación con la actividad laboral, ¿en qué situación se encuentra?

- ☐ En desempleo
- ☐ Trabajando
- ☐ Percibiendo una pensión (contributiva o no contributiva)

Acción Conjunta Intergeneracional (ACIG)

**Desempleo (DDM)**

16. En relación a su situación de desempleo, se encuentra:

- ☐ Percibiendo la prestación por desempleo
- ☐ Cobrando la ayuda familiar
- ☐ No percibo ingresos fijos
- ☐ Otro (especifique)

Acción Conjunta Intergeneracional (ACIG)

**Pensión (DDM)**

17. Percibo una pensión por:

- ☐ Jubilación (ordinaria, anticipada, parcial, flexible, especial)
- ☐ Incapacidad permanente (total, absoluta o gran invalidez)
- ☐ Fallecimiento (viudedad, orfandad o en favor de familiares)
- ☐ Invalidez

Acción Conjunta Intergeneracional (ACIG)

**Ocupación (DDM)**

18. ¿Cuál es su ocupación actual o lo era antes del desempleo o la jubilación?

- ☐ Educación
- ☐ Sanidad
- ☐ Administración y Servicios
- ☐ Industria y Construcción
- ☐ Alimentación y Medio Natural
- ☐ Estudiante
- ☐ Otro (especifique)

19. Ejerce o ejercía dicha ocupación como:

- ☐ Empleador
- ☐ Empresario sin asalariados o trabajador independiente
- ☐ Miembro de una cooperativa
- ☐ Asalariado del sector público
- ☐ Asalariado del sector privado
- ☐ No compete

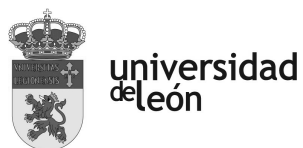

Acción Conjunta Intergeneracional (ACIG)

**Ingresos (DDM)**

20. Aproximadamente, ¿qué ingresos recibe al mes?

- ☐ Más de 2500 euros/mes
- ☐ Entre 2001-2500 euros/mes
- ☐ Entre 1501-2000 euros/mes
- ☐ Entre 1001-1500 euros/mes
- ☐ Entre 501-1000 euros/mes
- ☐ Menos de 500 euros/mes

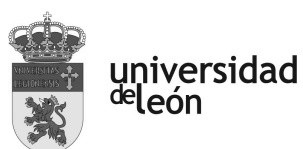

Acción Conjunta Intergeneracional (ACIG)

## Asociación (DDM)

21. ¿Pertenece a alguna asociación de afectados?

- ☐ Sí
- ☐ No

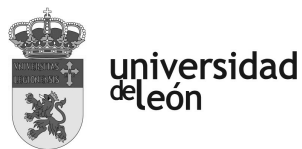

## Acción Conjunta Intergeneracional (ACIG)

### Tipo de Asociación (DDM)

22. Señale el tipo de asociación de afectados a la que pertenece:

- ☐ Discapacidad visual
- ☐ Discapacidad auditiva
- ☐ Discapacidad psíquica
- ☐ Discapacidad motórica
- ☐ Trastornos de aprendizaje
- ☐ Trastornos de conducta
- ☐ Trastornos de la comunicación
- ☐ Trastornos del espectro autista (TEA)
- ☐ Trastorno por déficit de atención con hiperactividad (TDAH)
- ☐ Otro (especifique)

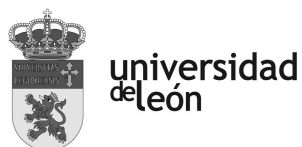

## Acción Conjunta Intergeneracional (ACIG)

### APOYO SOCIAL PERCIBIDO (ASP)

#### Apoyo Instrumental (ASP)

23. Indique si recibe algún tipo de APOYO INSTRUMENTAL relacionado con su cuidado personal (aseo, seguimiento de dietas), desplazamiento y/o movilidad, la realización de las tareas del hogar, trámites y/o gestiones administrativas...

☐ Sí

☐ No

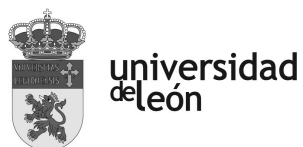

## Acción Conjunta Intergeneracional (ACIG)

### QUIÉNES - Apoyo Instrumental (ASP)

24. Señale por parte de QUIÉNES recibe dicho apoyo instrumental y el grado de satisfacción que ello le produce

|                                                               | Nada satisfecho       | Poco satisfecho       | Algo satisfecho       | Bastante satisfecho   | Muy satisfecho        |
|---------------------------------------------------------------|-----------------------|-----------------------|-----------------------|-----------------------|-----------------------|
| Mi pareja                                                     | <input type="radio"/> |
| Mis hijos                                                     | <input type="radio"/> |
| Mis nietos                                                    | <input type="radio"/> |
| Mis padres                                                    | <input type="radio"/> |
| Mis abuelos                                                   | <input type="radio"/> |
| Mis hermanos                                                  | <input type="radio"/> |
| Otros miembros de mi familia                                  | <input type="radio"/> |
| Mis amistades                                                 | <input type="radio"/> |
| Mis vecinos, conocidos, compañeros de trabajo                 | <input type="radio"/> |
| Asociaciones, organizaciones o personas en mi misma situación | <input type="radio"/> |
| Servicios de salud, sociales y sus profesionales              | <input type="radio"/> |
| La escuela y sus profesionales                                | <input type="radio"/> |
| Instituciones religiosas y sus miembros                       | <input type="radio"/> |

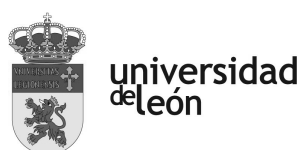

## Acción Conjunta Intergeneracional (ACIG)



## APOYO SOCIAL PERCIBIDO (ASP)

### Apoyo Emocional (ASP)

25. Indique si recibe algún tipo de APOYO EMOCIONAL expresado por la vía del cariño, la confianza, la escucha, la empatía, la transmisión física de afectos, el acompañamiento, sentimientos de complicidad, de preocupación por su vida personal y/o familiar...

☐ Sí

☐ No

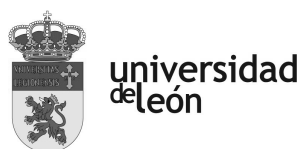

## Acción Conjunta Intergeneracional (ACIG)

### QUIÉNES - Apoyo Emocional (ASP)

26. Señale por parte de QUIÉNES recibe dicho apoyo emocional y el grado de satisfacción que ello le produce

|                                                               | Nada satisfecho       | Poco satisfecho       | Algo satisfecho       | Bastante satisfecho   | Muy satisfecho        |
|---------------------------------------------------------------|-----------------------|-----------------------|-----------------------|-----------------------|-----------------------|
| Mi pareja                                                     | <input type="radio"/> |
| Mis hijos                                                     | <input type="radio"/> |
| Mis nietos                                                    | <input type="radio"/> |
| Mis padres                                                    | <input type="radio"/> |
| Mis abuelos                                                   | <input type="radio"/> |
| Mis hermanos                                                  | <input type="radio"/> |
| Otros miembros de mi familia                                  | <input type="radio"/> |
| Mis amistades                                                 | <input type="radio"/> |
| Mis vecinos, conocidos, compañeros de trabajo                 | <input type="radio"/> |
| Asociaciones, organizaciones o personas en mi misma situación | <input type="radio"/> |
| Servicios de salud, sociales y sus profesionales              | <input type="radio"/> |
| La escuela y sus profesionales                                | <input type="radio"/> |
| Instituciones religiosas y sus miembros                       | <input type="radio"/> |

Acción Conjunta Intergeneracional (ACIG)

**ACTIVIDADES INTERGENERACIONALES (AIG)**

**ACTIVIDADES DE LA VIDA DIARIA Y DEL CUIDADO DE LA SALUD (AIG-VD)**

27. ¿Realiza ACTIVIDADES DE LA VIDA DIARIA Y DEL CUIDADO DE LA SALUD con personas de otra generación relacionadas con el aseo, el seguimiento de dietas, la movilidad, los desplazamientos, la adquisición de bienes y servicios, la realización de las labores del hogar, trámites y/o gestiones administrativas, el cumplimiento de prescripciones médicas...de forma conjunta?

☐ Sí

☐ No

Acción Conjunta Intergeneracional (ACIG)

**Actividades Vida Diaria y Cuidado Salud**

28. Realizar actividades de la vida diaria junto con personas de otra generación produce BENEFICIOS para su:

|                                                               | Totalmente<br>en<br>desacuerdo | En<br>desacuerdo      | Más bien en<br>desacuerdo | Ni de<br>acuerdo, ni<br>en<br>desacuerdo | Más bien de<br>acuerdo | De acuerdo            | Totalmente<br>de acuerdo |
|---------------------------------------------------------------|--------------------------------|-----------------------|---------------------------|------------------------------------------|------------------------|-----------------------|--------------------------|
| Salud física                                                  | <input type="radio"/>          | <input type="radio"/> | <input type="radio"/>     | <input type="radio"/>                    | <input type="radio"/>  | <input type="radio"/> | <input type="radio"/>    |
| Salud mental                                                  | <input type="radio"/>          | <input type="radio"/> | <input type="radio"/>     | <input type="radio"/>                    | <input type="radio"/>  | <input type="radio"/> | <input type="radio"/>    |
| Estado de ánimo                                               | <input type="radio"/>          | <input type="radio"/> | <input type="radio"/>     | <input type="radio"/>                    | <input type="radio"/>  | <input type="radio"/> | <input type="radio"/>    |
| Relaciones<br>interpersonales                                 | <input type="radio"/>          | <input type="radio"/> | <input type="radio"/>     | <input type="radio"/>                    | <input type="radio"/>  | <input type="radio"/> | <input type="radio"/>    |
| Autodeterminación o<br>capacidad para decidir<br>por sí mismo | <input type="radio"/>          | <input type="radio"/> | <input type="radio"/>     | <input type="radio"/>                    | <input type="radio"/>  | <input type="radio"/> | <input type="radio"/>    |
| Implicación y<br>participación social                         | <input type="radio"/>          | <input type="radio"/> | <input type="radio"/>     | <input type="radio"/>                    | <input type="radio"/>  | <input type="radio"/> | <input type="radio"/>    |
| Bienestar material u<br>económico                             | <input type="radio"/>          | <input type="radio"/> | <input type="radio"/>     | <input type="radio"/>                    | <input type="radio"/>  | <input type="radio"/> | <input type="radio"/>    |
| Bienestar laboral o<br>profesional                            | <input type="radio"/>          | <input type="radio"/> | <input type="radio"/>     | <input type="radio"/>                    | <input type="radio"/>  | <input type="radio"/> | <input type="radio"/>    |
| Educación o formación<br>académica                            | <input type="radio"/>          | <input type="radio"/> | <input type="radio"/>     | <input type="radio"/>                    | <input type="radio"/>  | <input type="radio"/> | <input type="radio"/>    |

29. ¿Con QUIÉNES realiza actividades de la vida diaria y del cuidado de la salud?

|                                                                        | Alguna vez al año     | Alguna vez al mes     | Alguna vez a la semana | Todos o casi todos los días |
|------------------------------------------------------------------------|-----------------------|-----------------------|------------------------|-----------------------------|
| Mi pareja                                                              | <input type="radio"/> | <input type="radio"/> | <input type="radio"/>  | <input type="radio"/>       |
| Mi hijo/a                                                              | <input type="radio"/> | <input type="radio"/> | <input type="radio"/>  | <input type="radio"/>       |
| Mi nieto/a                                                             | <input type="radio"/> | <input type="radio"/> | <input type="radio"/>  | <input type="radio"/>       |
| Mi padre/madre                                                         | <input type="radio"/> | <input type="radio"/> | <input type="radio"/>  | <input type="radio"/>       |
| Mi abuelo/a                                                            | <input type="radio"/> | <input type="radio"/> | <input type="radio"/>  | <input type="radio"/>       |
| Mi hermano/a                                                           | <input type="radio"/> | <input type="radio"/> | <input type="radio"/>  | <input type="radio"/>       |
| Otro miembro de mi familia                                             | <input type="radio"/> | <input type="radio"/> | <input type="radio"/>  | <input type="radio"/>       |
| Un amigo/a                                                             | <input type="radio"/> | <input type="radio"/> | <input type="radio"/>  | <input type="radio"/>       |
| Un vecino/a, conocido/a                                                | <input type="radio"/> | <input type="radio"/> | <input type="radio"/>  | <input type="radio"/>       |
| Un colega o compañero/a de trabajo                                     | <input type="radio"/> | <input type="radio"/> | <input type="radio"/>  | <input type="radio"/>       |
| Una persona en mi misma situación (problemática)                       | <input type="radio"/> | <input type="radio"/> | <input type="radio"/>  | <input type="radio"/>       |
| Persona / profesional de una asociación / organización / institución   | <input type="radio"/> | <input type="radio"/> | <input type="radio"/>  | <input type="radio"/>       |
| Persona / profesional de los servicios de salud, sociales o educativos | <input type="radio"/> | <input type="radio"/> | <input type="radio"/>  | <input type="radio"/>       |

30. EDAD de las personas con las que realiza actividades de la vida diaria y del cuidado de la salud:

|                                                                        | Menor de 6 años       | 6-14                  | 15-20                 | 21-39                 | 40-59                 | 60-65                 | 66-70                 | 71-75                 | Mayor de 75           |
|------------------------------------------------------------------------|-----------------------|-----------------------|-----------------------|-----------------------|-----------------------|-----------------------|-----------------------|-----------------------|-----------------------|
| Mi pareja                                                              | <input type="radio"/> |
| Mi hijo/a                                                              | <input type="radio"/> |
| Mi nieto/a                                                             | <input type="radio"/> |
| Mi padre/madre                                                         | <input type="radio"/> |
| Mi abuelo/a                                                            | <input type="radio"/> |
| Mi hermano/a                                                           | <input type="radio"/> |
| Otro miembro de mi familia                                             | <input type="radio"/> |
| Un amigo/a                                                             | <input type="radio"/> |
| Un vecino/a, conocido/a                                                | <input type="radio"/> |
| Un colega o compañero/a de trabajo                                     | <input type="radio"/> |
| Una persona en mi misma situación (problemática)                       | <input type="radio"/> |
| Persona / profesional de una asociación / organización / institución   | <input type="radio"/> |
| Persona / Profesional de los servicios de salud, sociales o educativos | <input type="radio"/> |

31. GÉNERO de las personas con las que realiza actividades de la vida diaria y del cuidado de la salud:

|                                                                        | Hombre                | Mujer                 |
|------------------------------------------------------------------------|-----------------------|-----------------------|
| Mi pareja                                                              | <input type="radio"/> | <input type="radio"/> |
| Mi hijo/a                                                              | <input type="radio"/> | <input type="radio"/> |
| Mi nieto/a                                                             | <input type="radio"/> | <input type="radio"/> |
| Mi padre/madre                                                         | <input type="radio"/> | <input type="radio"/> |
| Mi abuelo/a                                                            | <input type="radio"/> | <input type="radio"/> |
| Mi hermano/a                                                           | <input type="radio"/> | <input type="radio"/> |
| Otro miembro de mi familia                                             | <input type="radio"/> | <input type="radio"/> |
| Un amigo/a                                                             | <input type="radio"/> | <input type="radio"/> |
| Un vecino/a, conocido/a                                                | <input type="radio"/> | <input type="radio"/> |
| Un colega o compañero/a de trabajo                                     | <input type="radio"/> | <input type="radio"/> |
| Una persona en mi misma situación (problemática)                       | <input type="radio"/> | <input type="radio"/> |
| Persona / profesional de una asociación /organización / institución    | <input type="radio"/> | <input type="radio"/> |
| Persona / Profesional de los servicios de salud, sociales o educativos | <input type="radio"/> | <input type="radio"/> |

32. AUTONOMÍA de las personas con las que realiza actividades de la vida diaria y del cuidado de la salud:

|                                                                        | No necesita ayuda     | Necesita ayuda de un familiar/es | Necesita ayuda de un profesional/es | Necesita ayuda de otra persona/as |
|------------------------------------------------------------------------|-----------------------|----------------------------------|-------------------------------------|-----------------------------------|
| Mi pareja                                                              | <input type="radio"/> | <input type="radio"/>            | <input type="radio"/>               | <input type="radio"/>             |
| Mi hijo/a                                                              | <input type="radio"/> | <input type="radio"/>            | <input type="radio"/>               | <input type="radio"/>             |
| Mi nieto/a                                                             | <input type="radio"/> | <input type="radio"/>            | <input type="radio"/>               | <input type="radio"/>             |
| Mi padre/madre                                                         | <input type="radio"/> | <input type="radio"/>            | <input type="radio"/>               | <input type="radio"/>             |
| Mi abuelo/a                                                            | <input type="radio"/> | <input type="radio"/>            | <input type="radio"/>               | <input type="radio"/>             |
| Mi hermano/a                                                           | <input type="radio"/> | <input type="radio"/>            | <input type="radio"/>               | <input type="radio"/>             |
| Otro miembro de mi familia                                             | <input type="radio"/> | <input type="radio"/>            | <input type="radio"/>               | <input type="radio"/>             |
| Un amigo/a                                                             | <input type="radio"/> | <input type="radio"/>            | <input type="radio"/>               | <input type="radio"/>             |
| Un vecino/a, conocido/a                                                | <input type="radio"/> | <input type="radio"/>            | <input type="radio"/>               | <input type="radio"/>             |
| Un colega o compañero/a de trabajo                                     | <input type="radio"/> | <input type="radio"/>            | <input type="radio"/>               | <input type="radio"/>             |
| Una persona en mi misma situación (problemática)                       | <input type="radio"/> | <input type="radio"/>            | <input type="radio"/>               | <input type="radio"/>             |
| Persona / profesional de una asociación /organización / institución    | <input type="radio"/> | <input type="radio"/>            | <input type="radio"/>               | <input type="radio"/>             |
| Persona / Profesional de los servicios de salud, sociales o educativos | <input type="radio"/> | <input type="radio"/>            | <input type="radio"/>               | <input type="radio"/>             |

### 33. LIMITACIÓN de las personas con las que realiza actividades de la vida diaria y del cuidado de la salud:

|                                                                        | Sin discapacidad o dificultad de |                       |                       |                       |                       |                       | Trastorno de             |                       |                           | Trastorno del espectro autista (TEA) | Trastorno de déficit de atención con hiperactividad (TDAH) |
|------------------------------------------------------------------------|----------------------------------|-----------------------|-----------------------|-----------------------|-----------------------|-----------------------|--------------------------|-----------------------|---------------------------|--------------------------------------|------------------------------------------------------------|
|                                                                        | Otra                             | aprendizaje           | Discapacidad visual   | Discapacidad auditiva | Discapacidad psíquica | Discapacidad motórica | Trastorno de aprendizaje | Trastorno de conducta | Trastorno de comunicación |                                      |                                                            |
| Mi pareja                                                              | <input type="radio"/>            | <input type="radio"/> | <input type="radio"/> | <input type="radio"/> | <input type="radio"/> | <input type="radio"/> | <input type="radio"/>    | <input type="radio"/> | <input type="radio"/>     | <input type="radio"/>                | <input type="radio"/>                                      |
| Mi hijo/a                                                              | <input type="radio"/>            | <input type="radio"/> | <input type="radio"/> | <input type="radio"/> | <input type="radio"/> | <input type="radio"/> | <input type="radio"/>    | <input type="radio"/> | <input type="radio"/>     | <input type="radio"/>                | <input type="radio"/>                                      |
| Mi nieto/a                                                             | <input type="radio"/>            | <input type="radio"/> | <input type="radio"/> | <input type="radio"/> | <input type="radio"/> | <input type="radio"/> | <input type="radio"/>    | <input type="radio"/> | <input type="radio"/>     | <input type="radio"/>                | <input type="radio"/>                                      |
| Mi padre/madre                                                         | <input type="radio"/>            | <input type="radio"/> | <input type="radio"/> | <input type="radio"/> | <input type="radio"/> | <input type="radio"/> | <input type="radio"/>    | <input type="radio"/> | <input type="radio"/>     | <input type="radio"/>                | <input type="radio"/>                                      |
| Mi abuelo/a                                                            | <input type="radio"/>            | <input type="radio"/> | <input type="radio"/> | <input type="radio"/> | <input type="radio"/> | <input type="radio"/> | <input type="radio"/>    | <input type="radio"/> | <input type="radio"/>     | <input type="radio"/>                | <input type="radio"/>                                      |
| Mi hermano/a                                                           | <input type="radio"/>            | <input type="radio"/> | <input type="radio"/> | <input type="radio"/> | <input type="radio"/> | <input type="radio"/> | <input type="radio"/>    | <input type="radio"/> | <input type="radio"/>     | <input type="radio"/>                | <input type="radio"/>                                      |
| Otro miembro de mi familia                                             | <input type="radio"/>            | <input type="radio"/> | <input type="radio"/> | <input type="radio"/> | <input type="radio"/> | <input type="radio"/> | <input type="radio"/>    | <input type="radio"/> | <input type="radio"/>     | <input type="radio"/>                | <input type="radio"/>                                      |
| Un amigo/a                                                             | <input type="radio"/>            | <input type="radio"/> | <input type="radio"/> | <input type="radio"/> | <input type="radio"/> | <input type="radio"/> | <input type="radio"/>    | <input type="radio"/> | <input type="radio"/>     | <input type="radio"/>                | <input type="radio"/>                                      |
| Un vecino/a, conocido/a                                                | <input type="radio"/>            | <input type="radio"/> | <input type="radio"/> | <input type="radio"/> | <input type="radio"/> | <input type="radio"/> | <input type="radio"/>    | <input type="radio"/> | <input type="radio"/>     | <input type="radio"/>                | <input type="radio"/>                                      |
| Un colega o compañero/a de trabajo                                     | <input type="radio"/>            | <input type="radio"/> | <input type="radio"/> | <input type="radio"/> | <input type="radio"/> | <input type="radio"/> | <input type="radio"/>    | <input type="radio"/> | <input type="radio"/>     | <input type="radio"/>                | <input type="radio"/>                                      |
| Una persona en mi misma situación (problemática)                       | <input type="radio"/>            | <input type="radio"/> | <input type="radio"/> | <input type="radio"/> | <input type="radio"/> | <input type="radio"/> | <input type="radio"/>    | <input type="radio"/> | <input type="radio"/>     | <input type="radio"/>                | <input type="radio"/>                                      |
| Persona / profesional de una asociación /organización / institución    | <input type="radio"/>            | <input type="radio"/> | <input type="radio"/> | <input type="radio"/> | <input type="radio"/> | <input type="radio"/> | <input type="radio"/>    | <input type="radio"/> | <input type="radio"/>     | <input type="radio"/>                | <input type="radio"/>                                      |
| Persona / Profesional de los servicios de salud, sociales o educativos | <input type="radio"/>            | <input type="radio"/> | <input type="radio"/> | <input type="radio"/> | <input type="radio"/> | <input type="radio"/> | <input type="radio"/>    | <input type="radio"/> | <input type="radio"/>     | <input type="radio"/>                | <input type="radio"/>                                      |

34. SATISFACCIÓN que le produce realizar junto con estas personas actividades de la vida diaria y del cuidado de la salud:

|                                                                 | Nada satisfecho       | Poco satisfecho       | Algo satisfecho       | Bastante satisfecho   | Muy satisfecho        |
|-----------------------------------------------------------------|-----------------------|-----------------------|-----------------------|-----------------------|-----------------------|
| Mi pareja                                                       | <input type="radio"/> |
| Mi hijo/a                                                       | <input type="radio"/> |
| Mi nieto/a                                                      | <input type="radio"/> |
| Mi padre/madre                                                  | <input type="radio"/> |
| Mi abuelo/a                                                     | <input type="radio"/> |
| Mi hermano/a                                                    | <input type="radio"/> |
| Otro miembro de mi familia                                      | <input type="radio"/> |
| Un amigo/a                                                      | <input type="radio"/> |
| Un vecino/a, conocido/a                                         | <input type="radio"/> |
| Un colega o compañero/a de trabajo                              | <input type="radio"/> |
| Una persona en mi misma situación (problemática)                | <input type="radio"/> |
| Un profesional de una asociación u organización                 | <input type="radio"/> |
| Un profesional de los servicios de salud, sociales u educativos | <input type="radio"/> |

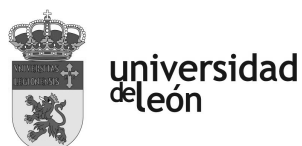

Acción Conjunta Intergeneracional (ACIG)

**ACTIVIDADES FORMATIVAS, CULTURALES Y DE OCIO (AIG-FORM)**

□

35. ¿Realiza ACTIVIDADES FORMATIVAS, CULTURALES y de OCIO con personas de otra generación, relacionadas con el aprendizaje o la enseñanza de la lectura y la escritura, ayudar o recibir apoyo en los estudios, la asistencia a clases de música o idiomas, a cursos de dibujo o pintura, talleres de bricolaje o jardinería, conferencias, cine, teatro... de forma conjunta?

- ☐ Sí
- ☐ No

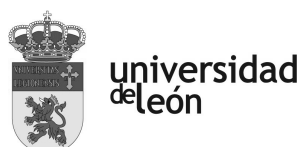

**Actividades Formativas, Culturales y de Ocio**

36. Realizar actividades formativas, culturales y de ocio junto con personas de otra generación produce BENEFICIOS para su:

|                                                               | Totalmente<br>en<br>desacuerdo | En<br>desacuerdo      | Más bien en<br>desacuerdo | Ni de<br>acuerdo, ni<br>en<br>desacuerdo | Más bien de<br>acuerdo | De acuerdo            | Totalmente<br>de acuerdo |
|---------------------------------------------------------------|--------------------------------|-----------------------|---------------------------|------------------------------------------|------------------------|-----------------------|--------------------------|
| Salud física                                                  | <input type="radio"/>          | <input type="radio"/> | <input type="radio"/>     | <input type="radio"/>                    | <input type="radio"/>  | <input type="radio"/> | <input type="radio"/>    |
| Salud mental                                                  | <input type="radio"/>          | <input type="radio"/> | <input type="radio"/>     | <input type="radio"/>                    | <input type="radio"/>  | <input type="radio"/> | <input type="radio"/>    |
| Estado de ánimo                                               | <input type="radio"/>          | <input type="radio"/> | <input type="radio"/>     | <input type="radio"/>                    | <input type="radio"/>  | <input type="radio"/> | <input type="radio"/>    |
| Relaciones<br>interpersonales                                 | <input type="radio"/>          | <input type="radio"/> | <input type="radio"/>     | <input type="radio"/>                    | <input type="radio"/>  | <input type="radio"/> | <input type="radio"/>    |
| Autodeterminación o<br>capacidad para decidir<br>por sí mismo | <input type="radio"/>          | <input type="radio"/> | <input type="radio"/>     | <input type="radio"/>                    | <input type="radio"/>  | <input type="radio"/> | <input type="radio"/>    |
| Implicación y<br>participación social                         | <input type="radio"/>          | <input type="radio"/> | <input type="radio"/>     | <input type="radio"/>                    | <input type="radio"/>  | <input type="radio"/> | <input type="radio"/>    |
| Bienestar material u<br>económico                             | <input type="radio"/>          | <input type="radio"/> | <input type="radio"/>     | <input type="radio"/>                    | <input type="radio"/>  | <input type="radio"/> | <input type="radio"/>    |
| Bienestar laboral o<br>profesional                            | <input type="radio"/>          | <input type="radio"/> | <input type="radio"/>     | <input type="radio"/>                    | <input type="radio"/>  | <input type="radio"/> | <input type="radio"/>    |
| Educación o formación<br>académica                            | <input type="radio"/>          | <input type="radio"/> | <input type="radio"/>     | <input type="radio"/>                    | <input type="radio"/>  | <input type="radio"/> | <input type="radio"/>    |

37. ¿Con QUIÉNES realiza actividades formativas, culturales y de ocio?

|                                                                       | Alguna vez al año     | Alguna vez al mes     | Alguna vez a la semana | Todos o casi todos los<br>días |
|-----------------------------------------------------------------------|-----------------------|-----------------------|------------------------|--------------------------------|
| Mi pareja                                                             | <input type="radio"/> | <input type="radio"/> | <input type="radio"/>  | <input type="radio"/>          |
| Mi hijo/a                                                             | <input type="radio"/> | <input type="radio"/> | <input type="radio"/>  | <input type="radio"/>          |
| Mi nieto/a                                                            | <input type="radio"/> | <input type="radio"/> | <input type="radio"/>  | <input type="radio"/>          |
| Mi padre/madre                                                        | <input type="radio"/> | <input type="radio"/> | <input type="radio"/>  | <input type="radio"/>          |
| Mi abuelo/a                                                           | <input type="radio"/> | <input type="radio"/> | <input type="radio"/>  | <input type="radio"/>          |
| Mi hermano/a                                                          | <input type="radio"/> | <input type="radio"/> | <input type="radio"/>  | <input type="radio"/>          |
| Otro miembro de mi<br>familia                                         | <input type="radio"/> | <input type="radio"/> | <input type="radio"/>  | <input type="radio"/>          |
| Un amigo/a                                                            | <input type="radio"/> | <input type="radio"/> | <input type="radio"/>  | <input type="radio"/>          |
| Un vecino/a,<br>conocido/a                                            | <input type="radio"/> | <input type="radio"/> | <input type="radio"/>  | <input type="radio"/>          |
| Un colega o<br>compañero/a de trabajo                                 | <input type="radio"/> | <input type="radio"/> | <input type="radio"/>  | <input type="radio"/>          |
| Una persona en mi<br>misma situación<br>(problemática)                | <input type="radio"/> | <input type="radio"/> | <input type="radio"/>  | <input type="radio"/>          |
| Un profesional de una<br>asociación u<br>organización                 | <input type="radio"/> | <input type="radio"/> | <input type="radio"/>  | <input type="radio"/>          |
| Un profesional de los<br>servicios de salud,<br>sociales u educativos | <input type="radio"/> | <input type="radio"/> | <input type="radio"/>  | <input type="radio"/>          |



38. EDAD de las personas con las que realiza actividades formativas, culturales y de ocio:

|                                                                        | Menor de<br>6 años    | 6-14                  | 15-20                 | 21-39                 | 40-59                 | 60-65                 | 66-70                 | 71-75                 | Mayor de<br>75        |
|------------------------------------------------------------------------|-----------------------|-----------------------|-----------------------|-----------------------|-----------------------|-----------------------|-----------------------|-----------------------|-----------------------|
| Mi pareja                                                              | <input type="radio"/> |
| Mi hijo/a                                                              | <input type="radio"/> |
| Mi nieto/a                                                             | <input type="radio"/> |
| Mi padre/madre                                                         | <input type="radio"/> |
| Mi abuelo/a                                                            | <input type="radio"/> |
| Mi hermano/a                                                           | <input type="radio"/> |
| Otro miembro de mi familia                                             | <input type="radio"/> |
| Un amigo/a                                                             | <input type="radio"/> |
| Un vecino/a, conocido/a                                                | <input type="radio"/> |
| Un colega o compañero/a de trabajo                                     | <input type="radio"/> |
| Una persona en mi misma situación (problemática)                       | <input type="radio"/> |
| Persona / profesional de una asociación /organización / institución    | <input type="radio"/> |
| Persona / Profesional de los servicios de salud, sociales o educativos | <input type="radio"/> |

39. GÉNERO de las personas con las que realiza actividades formativas, culturales y de ocio:

|                                                                        | Hombre                | Mujer                 |
|------------------------------------------------------------------------|-----------------------|-----------------------|
| Mi pareja                                                              | <input type="radio"/> | <input type="radio"/> |
| Mi hijo/a                                                              | <input type="radio"/> | <input type="radio"/> |
| Mi nieto/a                                                             | <input type="radio"/> | <input type="radio"/> |
| Mi padre/madre                                                         | <input type="radio"/> | <input type="radio"/> |
| Mi abuelo/a                                                            | <input type="radio"/> | <input type="radio"/> |
| Mi hermano/a                                                           | <input type="radio"/> | <input type="radio"/> |
| Otro miembro de mi familia                                             | <input type="radio"/> | <input type="radio"/> |
| Un amigo/a                                                             | <input type="radio"/> | <input type="radio"/> |
| Un vecino/a, conocido/a                                                | <input type="radio"/> | <input type="radio"/> |
| Un colega o compañero/a de trabajo                                     | <input type="radio"/> | <input type="radio"/> |
| Una persona en mi misma situación (problemática)                       | <input type="radio"/> | <input type="radio"/> |
| Persona / profesional de una asociación /organización / institución    | <input type="radio"/> | <input type="radio"/> |
| Persona / Profesional de los servicios de salud, sociales o educativos | <input type="radio"/> | <input type="radio"/> |

40. AUTONOMÍA de las personas con las que realiza actividades formativas, culturales y de ocio:

|                                                                        | No necesita ayuda     | Necesita ayuda de un familiar/es | Necesita ayuda de un profesional/es | Necesita ayuda de otra persona/as |
|------------------------------------------------------------------------|-----------------------|----------------------------------|-------------------------------------|-----------------------------------|
| Mi pareja                                                              | <input type="radio"/> | <input type="radio"/>            | <input type="radio"/>               | <input type="radio"/>             |
| Mi hijo/a                                                              | <input type="radio"/> | <input type="radio"/>            | <input type="radio"/>               | <input type="radio"/>             |
| Mi nieto/a                                                             | <input type="radio"/> | <input type="radio"/>            | <input type="radio"/>               | <input type="radio"/>             |
| Mi padre/madre                                                         | <input type="radio"/> | <input type="radio"/>            | <input type="radio"/>               | <input type="radio"/>             |
| Mi abuelo/a                                                            | <input type="radio"/> | <input type="radio"/>            | <input type="radio"/>               | <input type="radio"/>             |
| Mi hermano/a                                                           | <input type="radio"/> | <input type="radio"/>            | <input type="radio"/>               | <input type="radio"/>             |
| Otro miembro de mi familia                                             | <input type="radio"/> | <input type="radio"/>            | <input type="radio"/>               | <input type="radio"/>             |
| Un amigo/a                                                             | <input type="radio"/> | <input type="radio"/>            | <input type="radio"/>               | <input type="radio"/>             |
| Un vecino/a, conocido/a                                                | <input type="radio"/> | <input type="radio"/>            | <input type="radio"/>               | <input type="radio"/>             |
| Un colega o compañero/a de trabajo                                     | <input type="radio"/> | <input type="radio"/>            | <input type="radio"/>               | <input type="radio"/>             |
| Una persona en mi misma situación (problemática)                       | <input type="radio"/> | <input type="radio"/>            | <input type="radio"/>               | <input type="radio"/>             |
| Persona / profesional de una asociación /organización / institución    | <input type="radio"/> | <input type="radio"/>            | <input type="radio"/>               | <input type="radio"/>             |
| Persona / Profesional de los servicios de salud, sociales o educativos | <input type="radio"/> | <input type="radio"/>            | <input type="radio"/>               | <input type="radio"/>             |

41. LIMITACIÓN de las personas con las que realiza actividades formativas, culturales y de ocio:

|                                                                        | Sin discapacidad o dificultad de |                       |                       |                       |                       |                       | Trastorno de             |                       |                           | Trastorno del espectro autista (TEA) | Trastorno de déficit de atención con hiperactividad (TDAH) |
|------------------------------------------------------------------------|----------------------------------|-----------------------|-----------------------|-----------------------|-----------------------|-----------------------|--------------------------|-----------------------|---------------------------|--------------------------------------|------------------------------------------------------------|
|                                                                        | Otra                             | aprendizaje           | Discapacidad visual   | Discapacidad auditiva | Discapacidad psíquica | Discapacidad motórica | Trastorno de aprendizaje | Trastorno de conducta | Trastorno de comunicación |                                      |                                                            |
| Mi pareja                                                              | <input type="radio"/>            | <input type="radio"/> | <input type="radio"/> | <input type="radio"/> | <input type="radio"/> | <input type="radio"/> | <input type="radio"/>    | <input type="radio"/> | <input type="radio"/>     | <input type="radio"/>                | <input type="radio"/>                                      |
| Mi hijo/a                                                              | <input type="radio"/>            | <input type="radio"/> | <input type="radio"/> | <input type="radio"/> | <input type="radio"/> | <input type="radio"/> | <input type="radio"/>    | <input type="radio"/> | <input type="radio"/>     | <input type="radio"/>                | <input type="radio"/>                                      |
| Mi nieto/a                                                             | <input type="radio"/>            | <input type="radio"/> | <input type="radio"/> | <input type="radio"/> | <input type="radio"/> | <input type="radio"/> | <input type="radio"/>    | <input type="radio"/> | <input type="radio"/>     | <input type="radio"/>                | <input type="radio"/>                                      |
| Mi padre/madre                                                         | <input type="radio"/>            | <input type="radio"/> | <input type="radio"/> | <input type="radio"/> | <input type="radio"/> | <input type="radio"/> | <input type="radio"/>    | <input type="radio"/> | <input type="radio"/>     | <input type="radio"/>                | <input type="radio"/>                                      |
| Mi abuelo/a                                                            | <input type="radio"/>            | <input type="radio"/> | <input type="radio"/> | <input type="radio"/> | <input type="radio"/> | <input type="radio"/> | <input type="radio"/>    | <input type="radio"/> | <input type="radio"/>     | <input type="radio"/>                | <input type="radio"/>                                      |
| Mi hermano/a                                                           | <input type="radio"/>            | <input type="radio"/> | <input type="radio"/> | <input type="radio"/> | <input type="radio"/> | <input type="radio"/> | <input type="radio"/>    | <input type="radio"/> | <input type="radio"/>     | <input type="radio"/>                | <input type="radio"/>                                      |
| Otro miembro de mi familia                                             | <input type="radio"/>            | <input type="radio"/> | <input type="radio"/> | <input type="radio"/> | <input type="radio"/> | <input type="radio"/> | <input type="radio"/>    | <input type="radio"/> | <input type="radio"/>     | <input type="radio"/>                | <input type="radio"/>                                      |
| Un amigo/a                                                             | <input type="radio"/>            | <input type="radio"/> | <input type="radio"/> | <input type="radio"/> | <input type="radio"/> | <input type="radio"/> | <input type="radio"/>    | <input type="radio"/> | <input type="radio"/>     | <input type="radio"/>                | <input type="radio"/>                                      |
| Un vecino/a, conocido/a                                                | <input type="radio"/>            | <input type="radio"/> | <input type="radio"/> | <input type="radio"/> | <input type="radio"/> | <input type="radio"/> | <input type="radio"/>    | <input type="radio"/> | <input type="radio"/>     | <input type="radio"/>                | <input type="radio"/>                                      |
| Un colega o compañero/a de trabajo                                     | <input type="radio"/>            | <input type="radio"/> | <input type="radio"/> | <input type="radio"/> | <input type="radio"/> | <input type="radio"/> | <input type="radio"/>    | <input type="radio"/> | <input type="radio"/>     | <input type="radio"/>                | <input type="radio"/>                                      |
| Una persona en mi misma situación (problemática)                       | <input type="radio"/>            | <input type="radio"/> | <input type="radio"/> | <input type="radio"/> | <input type="radio"/> | <input type="radio"/> | <input type="radio"/>    | <input type="radio"/> | <input type="radio"/>     | <input type="radio"/>                | <input type="radio"/>                                      |
| Persona / profesional de una asociación /organización / institución    | <input type="radio"/>            | <input type="radio"/> | <input type="radio"/> | <input type="radio"/> | <input type="radio"/> | <input type="radio"/> | <input type="radio"/>    | <input type="radio"/> | <input type="radio"/>     | <input type="radio"/>                | <input type="radio"/>                                      |
| Persona / Profesional de los servicios de salud, sociales o educativos | <input type="radio"/>            | <input type="radio"/> | <input type="radio"/> | <input type="radio"/> | <input type="radio"/> | <input type="radio"/> | <input type="radio"/>    | <input type="radio"/> | <input type="radio"/>     | <input type="radio"/>                | <input type="radio"/>                                      |

42. SATISFACCIÓN que le produce realizar junto con estas personas actividades formativas, culturales y de ocio:

|                                                                        | Nada satisfecho       | Poco satisfecho       | Algo satisfecho       | Bastante satisfecho   | Muy satisfecho        |
|------------------------------------------------------------------------|-----------------------|-----------------------|-----------------------|-----------------------|-----------------------|
| Mi pareja                                                              | <input type="radio"/> |
| Mi hijo/a                                                              | <input type="radio"/> |
| Mi nieto/a                                                             | <input type="radio"/> |
| Mi padre/madre                                                         | <input type="radio"/> |
| Mi abuelo/a                                                            | <input type="radio"/> |
| Mi hermano/a                                                           | <input type="radio"/> |
| Otro miembro de mi familia                                             | <input type="radio"/> |
| Un amigo/a                                                             | <input type="radio"/> |
| Un vecino/a, conocido/a                                                | <input type="radio"/> |
| Un colega o compañero/a de trabajo                                     | <input type="radio"/> |
| Una persona en mi misma situación (problemática)                       | <input type="radio"/> |
| Persona / profesional de una asociación /organización / institución    | <input type="radio"/> |
| Persona / Profesional de los servicios de salud, sociales o educativos | <input type="radio"/> |

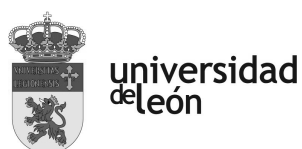

Acción Conjunta Intergeneracional (ACIG)

### ACTIVIDADES FÍSICAS Y DEPORTIVAS (AIG-FYD)

43. ¿Realiza algún tipo de ACTIVIDAD FÍSICA O PRACTICA DEPORTIVA tales como subir escaleras, salir a pasear, a correr, jugar a la petanca, al fútbol, etc., junto con personas de otra generación?

- ☐ Sí
- ☐ No

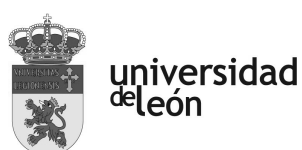

Acción Conjunta Intergeneracional (ACIG)

## Actividades Físicas y Deportivas

44. Realizar actividades físicas y deportivas junto con personas de otra generación produce BENEFICIOS para su:

|                                                               | Totalmente<br>en<br>desacuerdo | En<br>desacuerdo      | Más bien en<br>desacuerdo | Ni de<br>acuerdo, ni<br>en<br>desacuerdo | Más bien de<br>acuerdo | De acuerdo            | Totalmente<br>de acuerdo |
|---------------------------------------------------------------|--------------------------------|-----------------------|---------------------------|------------------------------------------|------------------------|-----------------------|--------------------------|
| Salud física                                                  | <input type="radio"/>          | <input type="radio"/> | <input type="radio"/>     | <input type="radio"/>                    | <input type="radio"/>  | <input type="radio"/> | <input type="radio"/>    |
| Salud mental                                                  | <input type="radio"/>          | <input type="radio"/> | <input type="radio"/>     | <input type="radio"/>                    | <input type="radio"/>  | <input type="radio"/> | <input type="radio"/>    |
| Estado de ánimo                                               | <input type="radio"/>          | <input type="radio"/> | <input type="radio"/>     | <input type="radio"/>                    | <input type="radio"/>  | <input type="radio"/> | <input type="radio"/>    |
| Relaciones<br>interpersonales                                 | <input type="radio"/>          | <input type="radio"/> | <input type="radio"/>     | <input type="radio"/>                    | <input type="radio"/>  | <input type="radio"/> | <input type="radio"/>    |
| Autodeterminación o<br>capacidad para decidir<br>por sí mismo | <input type="radio"/>          | <input type="radio"/> | <input type="radio"/>     | <input type="radio"/>                    | <input type="radio"/>  | <input type="radio"/> | <input type="radio"/>    |
| Implicación y<br>participación social                         | <input type="radio"/>          | <input type="radio"/> | <input type="radio"/>     | <input type="radio"/>                    | <input type="radio"/>  | <input type="radio"/> | <input type="radio"/>    |
| Bienestar material u<br>económico                             | <input type="radio"/>          | <input type="radio"/> | <input type="radio"/>     | <input type="radio"/>                    | <input type="radio"/>  | <input type="radio"/> | <input type="radio"/>    |
| Bienestar laboral o<br>profesional                            | <input type="radio"/>          | <input type="radio"/> | <input type="radio"/>     | <input type="radio"/>                    | <input type="radio"/>  | <input type="radio"/> | <input type="radio"/>    |
| Educación o formación<br>académica                            | <input type="radio"/>          | <input type="radio"/> | <input type="radio"/>     | <input type="radio"/>                    | <input type="radio"/>  | <input type="radio"/> | <input type="radio"/>    |

45. ¿Con QUIÉNES realiza actividades físicas y deportivas?

|                                                                                 | Alguna vez al año     | Alguna vez al mes     | Alguna vez a la semana | Todos o casi todos los<br>días |
|---------------------------------------------------------------------------------|-----------------------|-----------------------|------------------------|--------------------------------|
| Mi pareja                                                                       | <input type="radio"/> | <input type="radio"/> | <input type="radio"/>  | <input type="radio"/>          |
| Mi hijo/a                                                                       | <input type="radio"/> | <input type="radio"/> | <input type="radio"/>  | <input type="radio"/>          |
| Mi nieto/a                                                                      | <input type="radio"/> | <input type="radio"/> | <input type="radio"/>  | <input type="radio"/>          |
| Mi padre/madre                                                                  | <input type="radio"/> | <input type="radio"/> | <input type="radio"/>  | <input type="radio"/>          |
| Mi abuelo/a                                                                     | <input type="radio"/> | <input type="radio"/> | <input type="radio"/>  | <input type="radio"/>          |
| Mi hermano/a                                                                    | <input type="radio"/> | <input type="radio"/> | <input type="radio"/>  | <input type="radio"/>          |
| Otro miembro de mi<br>familia                                                   | <input type="radio"/> | <input type="radio"/> | <input type="radio"/>  | <input type="radio"/>          |
| Un amigo/a                                                                      | <input type="radio"/> | <input type="radio"/> | <input type="radio"/>  | <input type="radio"/>          |
| Un vecino/a,<br>conocido/a                                                      | <input type="radio"/> | <input type="radio"/> | <input type="radio"/>  | <input type="radio"/>          |
| Un colega o<br>compañero/a de trabajo                                           | <input type="radio"/> | <input type="radio"/> | <input type="radio"/>  | <input type="radio"/>          |
| Una persona en mi<br>misma situación<br>(problemática)                          | <input type="radio"/> | <input type="radio"/> | <input type="radio"/>  | <input type="radio"/>          |
| Persona / profesional<br>de una asociación<br>/organización /<br>institución    | <input type="radio"/> | <input type="radio"/> | <input type="radio"/>  | <input type="radio"/>          |
| Persona / Profesional<br>de los servicios de<br>salud, sociales o<br>educativos | <input type="radio"/> | <input type="radio"/> | <input type="radio"/>  | <input type="radio"/>          |

46. EDAD de las personas con las que realiza actividades físicas y deportivas:

|                                                                        | Menor de<br>6 años    | 6-14                  | 15-20                 | 21-39                 | 40-59                 | 60-65                 | 66-70                 | 71-75                 | Mayor de<br>75        |
|------------------------------------------------------------------------|-----------------------|-----------------------|-----------------------|-----------------------|-----------------------|-----------------------|-----------------------|-----------------------|-----------------------|
| Mi pareja                                                              | <input type="radio"/> |
| Mi hijo/a                                                              | <input type="radio"/> |
| Mi nieto/a                                                             | <input type="radio"/> |
| Mi padre/madre                                                         | <input type="radio"/> |
| Mi abuelo/a                                                            | <input type="radio"/> |
| Mi hermano/a                                                           | <input type="radio"/> |
| Otro miembro de mi familia                                             | <input type="radio"/> |
| Un amigo/a                                                             | <input type="radio"/> |
| Un vecino/a, conocido/a                                                | <input type="radio"/> |
| Un colega o compañero/a de trabajo                                     | <input type="radio"/> |
| Una persona en mi misma situación (problemática)                       | <input type="radio"/> |
| Persona / profesional de una asociación /organización / institución    | <input type="radio"/> |
| Persona / Profesional de los servicios de salud, sociales o educativos | <input type="radio"/> |

47. GÉNERO de las personas con las que realiza actividades físicas y deportivas:

|                                                                 | Hombre                | Mujer                 |
|-----------------------------------------------------------------|-----------------------|-----------------------|
| Mi pareja                                                       | <input type="radio"/> | <input type="radio"/> |
| Mi hijo/a                                                       | <input type="radio"/> | <input type="radio"/> |
| Mi nieto/a                                                      | <input type="radio"/> | <input type="radio"/> |
| Mi padre/madre                                                  | <input type="radio"/> | <input type="radio"/> |
| Mi abuelo/a                                                     | <input type="radio"/> | <input type="radio"/> |
| Mi hermano/a                                                    | <input type="radio"/> | <input type="radio"/> |
| Otro miembro de mi familia                                      | <input type="radio"/> | <input type="radio"/> |
| Un amigo/a                                                      | <input type="radio"/> | <input type="radio"/> |
| Un vecino/a, conocido/a                                         | <input type="radio"/> | <input type="radio"/> |
| Un colega o compañero/a de trabajo                              | <input type="radio"/> | <input type="radio"/> |
| Una persona en mi misma situación (problemática)                | <input type="radio"/> | <input type="radio"/> |
| Un profesional de una asociación u organización                 | <input type="radio"/> | <input type="radio"/> |
| Un profesional de los servicios de salud, sociales u educativos | <input type="radio"/> | <input type="radio"/> |

48. AUTONOMÍA de las personas con las que realiza actividades físicas y deportivas:

|                                                                        | No necesita ayuda     | Necesita ayuda de un familiar/es | Necesita ayuda de un profesional/es | Necesita ayuda de otra persona/as |
|------------------------------------------------------------------------|-----------------------|----------------------------------|-------------------------------------|-----------------------------------|
| Mi pareja                                                              | <input type="radio"/> | <input type="radio"/>            | <input type="radio"/>               | <input type="radio"/>             |
| Mi hijo/a                                                              | <input type="radio"/> | <input type="radio"/>            | <input type="radio"/>               | <input type="radio"/>             |
| Mi nieto/a                                                             | <input type="radio"/> | <input type="radio"/>            | <input type="radio"/>               | <input type="radio"/>             |
| Mi padre/madre                                                         | <input type="radio"/> | <input type="radio"/>            | <input type="radio"/>               | <input type="radio"/>             |
| Mi abuelo/a                                                            | <input type="radio"/> | <input type="radio"/>            | <input type="radio"/>               | <input type="radio"/>             |
| Mi hermano/a                                                           | <input type="radio"/> | <input type="radio"/>            | <input type="radio"/>               | <input type="radio"/>             |
| Otro miembro de mi familia                                             | <input type="radio"/> | <input type="radio"/>            | <input type="radio"/>               | <input type="radio"/>             |
| Un amigo/a                                                             | <input type="radio"/> | <input type="radio"/>            | <input type="radio"/>               | <input type="radio"/>             |
| Un vecino/a, conocido/a                                                | <input type="radio"/> | <input type="radio"/>            | <input type="radio"/>               | <input type="radio"/>             |
| Un colega o compañero/a de trabajo                                     | <input type="radio"/> | <input type="radio"/>            | <input type="radio"/>               | <input type="radio"/>             |
| Una persona en mi misma situación (problemática)                       | <input type="radio"/> | <input type="radio"/>            | <input type="radio"/>               | <input type="radio"/>             |
| Persona / profesional de una asociación /organización / institución    | <input type="radio"/> | <input type="radio"/>            | <input type="radio"/>               | <input type="radio"/>             |
| Persona / Profesional de los servicios de salud, sociales o educativos | <input type="radio"/> | <input type="radio"/>            | <input type="radio"/>               | <input type="radio"/>             |

49. LIMITACIÓN de las personas con las que realiza actividades físicas y deportivas:

|                                                                        | Sin discapacidad o dificultad de |                       |                       |                       |                       |                       | Trastorno de          | Trastorno de          | Trastorno de          | Trastorno del espectro autista (TEA) | Trastorno de déficit de atención con hiperactividad (TDAH) |
|------------------------------------------------------------------------|----------------------------------|-----------------------|-----------------------|-----------------------|-----------------------|-----------------------|-----------------------|-----------------------|-----------------------|--------------------------------------|------------------------------------------------------------|
|                                                                        | Otra                             | aprendizaje           | Discapacidad visual   | Discapacidad auditiva | Discapacidad psíquica | Discapacidad motórica | de aprendizaje        | de conducta           | comunicación          |                                      |                                                            |
| Mi pareja                                                              | <input type="radio"/>            | <input type="radio"/> | <input type="radio"/> | <input type="radio"/> | <input type="radio"/> | <input type="radio"/> | <input type="radio"/> | <input type="radio"/> | <input type="radio"/> | <input type="radio"/>                | <input type="radio"/>                                      |
| Mi hijo/a                                                              | <input type="radio"/>            | <input type="radio"/> | <input type="radio"/> | <input type="radio"/> | <input type="radio"/> | <input type="radio"/> | <input type="radio"/> | <input type="radio"/> | <input type="radio"/> | <input type="radio"/>                | <input type="radio"/>                                      |
| Mi nieto/a                                                             | <input type="radio"/>            | <input type="radio"/> | <input type="radio"/> | <input type="radio"/> | <input type="radio"/> | <input type="radio"/> | <input type="radio"/> | <input type="radio"/> | <input type="radio"/> | <input type="radio"/>                | <input type="radio"/>                                      |
| Mi padre/madre                                                         | <input type="radio"/>            | <input type="radio"/> | <input type="radio"/> | <input type="radio"/> | <input type="radio"/> | <input type="radio"/> | <input type="radio"/> | <input type="radio"/> | <input type="radio"/> | <input type="radio"/>                | <input type="radio"/>                                      |
| Mi abuelo/a                                                            | <input type="radio"/>            | <input type="radio"/> | <input type="radio"/> | <input type="radio"/> | <input type="radio"/> | <input type="radio"/> | <input type="radio"/> | <input type="radio"/> | <input type="radio"/> | <input type="radio"/>                | <input type="radio"/>                                      |
| Mi hermano/a                                                           | <input type="radio"/>            | <input type="radio"/> | <input type="radio"/> | <input type="radio"/> | <input type="radio"/> | <input type="radio"/> | <input type="radio"/> | <input type="radio"/> | <input type="radio"/> | <input type="radio"/>                | <input type="radio"/>                                      |
| Otro miembro de mi familia                                             | <input type="radio"/>            | <input type="radio"/> | <input type="radio"/> | <input type="radio"/> | <input type="radio"/> | <input type="radio"/> | <input type="radio"/> | <input type="radio"/> | <input type="radio"/> | <input type="radio"/>                | <input type="radio"/>                                      |
| Un amigo/a                                                             | <input type="radio"/>            | <input type="radio"/> | <input type="radio"/> | <input type="radio"/> | <input type="radio"/> | <input type="radio"/> | <input type="radio"/> | <input type="radio"/> | <input type="radio"/> | <input type="radio"/>                | <input type="radio"/>                                      |
| Un vecino/a, conocido/a                                                | <input type="radio"/>            | <input type="radio"/> | <input type="radio"/> | <input type="radio"/> | <input type="radio"/> | <input type="radio"/> | <input type="radio"/> | <input type="radio"/> | <input type="radio"/> | <input type="radio"/>                | <input type="radio"/>                                      |
| Un colega o compañero/a de trabajo                                     | <input type="radio"/>            | <input type="radio"/> | <input type="radio"/> | <input type="radio"/> | <input type="radio"/> | <input type="radio"/> | <input type="radio"/> | <input type="radio"/> | <input type="radio"/> | <input type="radio"/>                | <input type="radio"/>                                      |
| Una persona en mi misma situación (problemática)                       | <input type="radio"/>            | <input type="radio"/> | <input type="radio"/> | <input type="radio"/> | <input type="radio"/> | <input type="radio"/> | <input type="radio"/> | <input type="radio"/> | <input type="radio"/> | <input type="radio"/>                | <input type="radio"/>                                      |
| Persona / profesional de una asociación /organización / institución    | <input type="radio"/>            | <input type="radio"/> | <input type="radio"/> | <input type="radio"/> | <input type="radio"/> | <input type="radio"/> | <input type="radio"/> | <input type="radio"/> | <input type="radio"/> | <input type="radio"/>                | <input type="radio"/>                                      |
| Persona / Profesional de los servicios de salud, sociales o educativos | <input type="radio"/>            | <input type="radio"/> | <input type="radio"/> | <input type="radio"/> | <input type="radio"/> | <input type="radio"/> | <input type="radio"/> | <input type="radio"/> | <input type="radio"/> | <input type="radio"/>                | <input type="radio"/>                                      |



50. SATISFACCIÓN que le produce realizar junto con estas personas actividades físicas y deportivas:

|                                                                        | Nada satisfecho       | Poco satisfecho       | Algo satisfecho       | Bastante satisfecho   | Muy satisfecho        |
|------------------------------------------------------------------------|-----------------------|-----------------------|-----------------------|-----------------------|-----------------------|
| Mi pareja                                                              | <input type="radio"/> |
| Mi hijo/a                                                              | <input type="radio"/> |
| Mi nieto/a                                                             | <input type="radio"/> |
| Mi padre/madre                                                         | <input type="radio"/> |
| Mi abuelo/a                                                            | <input type="radio"/> |
| Mi hermano/a                                                           | <input type="radio"/> |
| Otro miembro de mi familia                                             | <input type="radio"/> |
| Un amigo/a                                                             | <input type="radio"/> |
| Un vecino/a, conocido/a                                                | <input type="radio"/> |
| Un colega o compañero/a de trabajo                                     | <input type="radio"/> |
| Una persona en mi misma situación (problemática)                       | <input type="radio"/> |
| Persona / profesional de una asociación /organización / institución    | <input type="radio"/> |
| Persona / Profesional de los servicios de salud, sociales o educativos | <input type="radio"/> |



Acción Conjunta Intergeneracional (ACIG)

## ACTIVIDADES INTERGENERACIONALES VIRTUALES (AIGV)

### ACTIVIDADES CON HERRAMIENTAS DE COMUNICACIÓN VIRTUALES (AIGV-COM)

□

51. ¿Utiliza HERRAMIENTAS DE COMUNICACIÓN VIRTUALES (Skype, Whatsapp, Correo electrónico, etc.) con personas de otra generación de forma conjunta?

- ☐ Sí
- ☐ No

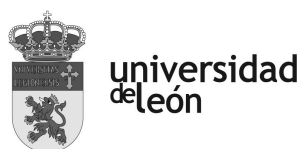

Supplement: s1 [file s1]
